# Supplementary material
Source: PubMed Central journal article supplement (PMC3600405)
Supplement: NIHMS426103-supplement-S1.pdf [file NIHMS426103-supplement-S1.pdf]

Burton *et al.*, manuscript ID MI-12-214 Supplementary material:

Supplementary Figure 1: Adobe acrobat file (.pdf) depicting alterations in mast cells within intestinal compartments. Figure legend included within the pdf document.
